# Supplementary material for: Combining Landscape Genomics and Ecological Modelling to Investigate Local Adaptation of Indigenous Ugandan Cattle to East Coast Fever
Source: PubMed Central journal article supplement (PMC6177531; doi:10.3389/fgene.2018.00385), 2018-10-03
Supplement: Presentation_1.pdf [file Presentation_1.pdf]

*Supplementary Material*

**Combining landscape genomics and ecological modelling to investigate local adaptation of indigenous Ugandan cattle to East Coast fever**

**Elia Vajana<sup>\*</sup>, Mario Barbato, Licia Colli, Marco Milanese, Estelle Rochat, Enrico Fabrizi, Christopher Mukasa, Marcello Del Corvo, Charles Masembe, Vincent Muwanika, Fredrick Kabi, Tad Stewart Sonstegard, Heather Jay Huson, Riccardo Negrini, Stéphane Joost, Paolo Ajmone-Marsan, on behalf of The NextGen Consortium**

**\* Correspondence:** Elia Vajana: [elia.vajana@epfl.ch](mailto:elia.vajana@epfl.ch)

## **1 Supplementary Text**

### **1.1 Supplementary Text 1. MODIS collection 5 data.**

The 72 ten-days annual NDVI periods used in the present study are based on the MODIS collection 5 (C5) data, whose processing ended in March 2017 (Budde, 2018; *personal communication*). C5 data are no longer distributed, so that the link <http://earlywarning.usgs.gov/fews/product/116> originally used for the download has expired. Upon permission from the US Geological Survey (USGS), we make available the C5 NDVI data from the Dryad Digital Repository (Heneghan et al., 2011): [doi:10.5061/dryad.sf5j2bf](https://doi.org/10.5061/dryad.sf5j2bf).

## 1.2 Supplementary Text 2. Statistical significance of genotype-environment associations.

Statistical significance of genotype-environment associations was evaluated by means of a likelihood-ratio (LR) test. Null and alternative models (NM and AM, respectively) were compared for each genotype.

Given a specific genotype, NM was specified as:

$$\ln\left(\frac{\pi_i}{1 - \pi_i}\right) = \beta_0 + \sum_{s=1}^S \beta_s x_{si}$$

where  $\beta_0$  represents the model intercept,  $\beta_s$  the regression coefficient related to the  $s$ -th population structure predictor, and  $x_{si}$  the  $i$ -th observation of the  $s$ -th population structure predictor.

AM was specified as:

$$\ln\left(\frac{\pi_i}{1 - \pi_i}\right) = \beta_0 + \beta_Z z_i + \sum_{s=1}^S \beta_s x_{si}$$

where  $\beta_Z$  is the regression coefficient for the environmental variable  $Z$ , and  $z_i$  is the  $i$ -th observation of  $Z$ .

This way, NM is nested within AM (i.e. NM=AM when  $\beta_Z=0$ ). Then, a LR test was performed for each genotype to test if the inclusion of  $Z$  (i.e. in turn  $\psi_R$  or  $\gamma$ ) led to a significantly improved explanation of the genotype spatial distribution. Particularly, as SAM $\beta$ ADA returns log-likelihood (LogL) values, the LR test was specified as:

$$D = -2(\text{LogL NM} - \text{LogL AM})$$

Under the null hypothesis that NM and AM have the same log-likelihoods (i.e.  $D=0$ ),  $D$  follows a  $\chi^2$  distribution with degrees of freedom equal to the difference in the number of parameters between AM and NM. Here,  $p$ -values were derived from a  $\chi^2$  distribution with one degree of freedom (AM having one parameter more than NM; see figure hereafter).  $P$ -values estimate was performed with the R function `pchisq`, by setting the appropriate value for degrees of freedom. The option `lower=FALSE` was used to compute the probability of obtaining the observed (or more extreme)  $D$  values under the null hypothesis.

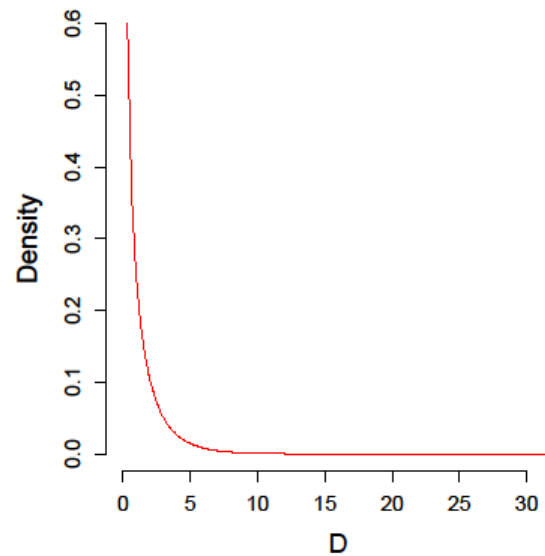

Expected distribution of the likelihood-ratio test statistic ( $D$ ) under the null hypothesis that NM and AM have the same log-likelihoods (i.e.  $D=0$ ). Here,  $D$  values are distributed following a  $\chi^2$  distribution with one degree of freedom.

### 1.3 Supplementary Text 3. Additional SAMβADA analysis ( $K=3$ and $K=16$ corrections).

In order to test SAMβADA results obtained with the  $K=4$  correction (see main text), we also performed genotype-environment associations tests with alternative population structure predictors. Particularly, an additional ADMIXTURE analysis was performed on PSD for  $K$  values from two to 30 (Supplementary Figure 4) (Kopelman et al., 2015), and the membership coefficients from the  $K=3/K=16$  cluster solutions were independently used as population structure predictors:  $K=3$  was chosen to account for the fundamental gene pools present in cattle (i.e. African *Bos taurus taurus*, European *B. t. taurus* and *B. t. indicus*), and  $K=16$  as the cluster solution showing the lowest CV error (see figure hereafter). In both the cases, a PCA was performed on the membership coefficients to obtain synthetic and orthogonal population structure predictors following the same procedure described in main text. When correcting for  $K=3$ , the first and second principal components (accounting for 63% and 37% of the variance within membership coefficients, respectively) were retained. The principal components from one to seven (accounting for 70% of the original variance within membership coefficients) were used when correcting for  $K=16$  (Jolliffe, 2002). Results of additional SAMβADA analysis for the  $K=3/K=16$  corrections are reported in Supplementary Figure 12.

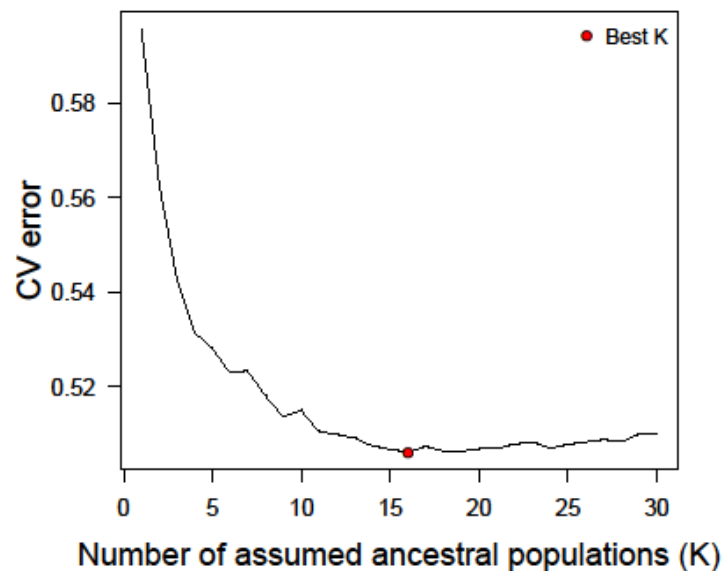

Cross-validation (CV) errors associated with the cluster solutions ( $K$ ) tested for partitioning PSD.

#### 1.4 Supplementary Text 4. Selection of reference populations for local ancestry analyses.

Global ancestry analysis evidenced the presence of all the fundamental cattle gene pools in the individuals composing LGD, i.e. *B. t. indicus*, African *B. t. taurus* and European *B. t. taurus*, other than a major admixed sanga component (see main text, and Supplementary Figure 4 for  $K \geq 3$ ). Non-admixed reference populations were used for local admixture analysis, in order to potentiate PCADMIX discriminant power (Barbato et al., 2017). Therefore, we selected two zebuine references (Tharparkar and Lohani), one African *B. t. taurus* reference (Muturu), and one European *B. t. taurus* reference (Hereford; see table hereafter), all expected with null or negligible signals of introgression according to global ancestry results (Supplementary Figure 4) and literature findings (Decker et al., 2014).

Four taurine/zebuine references combinations were tested: (i) Muturu-Tharparkar; (ii) Muturu-Lohani; (iii) Hereford-Tharparkar; (iv) Hereford-Lohani.

##### Reference populations used in PCADMIX analysis.

| Reference population | Code | Type                         | N  | Origin          | Source         |
|----------------------|------|------------------------------|----|-----------------|----------------|
| Tharparkar           | THA  | <i>B. t. indicus</i>         | 13 | Asia (Pakistan) | S <sup>a</sup> |
| Lohani               | LOH  | <i>B. t. indicus</i>         | 13 | Asia (Pakistan) | S              |
| Muturu               | MUT  | African <i>B. t. taurus</i>  | 13 | West Africa     | S              |
| Hereford             | HFD  | European <i>B. t. taurus</i> | 27 | Europe          | S              |

The table summarizes breed names (Reference population), acronyms (Code), cattle type (Type), sample sizes (N), geographical origin (Origin), and data source (Source). <sup>a</sup>Genotypes provided by T. S. Sonstegard.

### 1.5 Supplementary Text 5. Beta regression results on additional local ancestry analyses.

Beta regression analysis was performed after all PCADMIX comparisons (Supplementary Text 4), by following the procedure described in the main text (see section Materials and Methods). Hereafter, results are shown for (i) the Muturu-Tharparkar comparison (Table 1), (ii) the Muturu-Lohani comparison (Table 2), (iii) the Hereford-Tharparkar comparison (Table 3), and (iv) the Hereford-Lohani comparison (Table 4).

**Table 1.** Muturu-Tharparkar comparison (result shown in the main text).

| Coefficient | Estimate     | SE    | <i>p</i> -value  | OR    | OR <sub>low</sub> <sup>a</sup> | OR <sub>up</sub> <sup>b</sup> |
|-------------|--------------|-------|------------------|-------|--------------------------------|-------------------------------|
| $\beta_0$   | 0.144        | 0.194 | 4.56E-01         | 1.155 | 0.790                          | 1.689                         |
| $\psi_{Rc}$ | <b>1.663</b> | 0.768 | <b>3.04E-02*</b> | 5.275 | 1.171                          | 23.767                        |
| $\phi$      | 2.029        | 0.346 |                  |       |                                |                               |
| Coefficient | Estimate     | SE    | <i>p</i> -value  | OR    | OR <sub>low</sub>              | OR <sub>up</sub>              |
| $\beta_0$   | 1.362        | 0.479 | 4.44E-03*        | 3.904 | 1.527                          | 9.983                         |
| $\gamma_c$  | -2.067       | 1.695 | 2.23E-01         | 0.127 | 0.005                          | 3.509                         |
| $\phi$      | 2.103        | 0.375 |                  |       |                                |                               |

*Upper table:* beta regression results between Tharparkar ancestry at window 13 (chromosome 26) and average *Rhipicephalus appendiculatus* occurrence probability per cell ( $\psi_{Rc}$ ). *Lower table:* association between Tharparkar ancestry at window 145 (chromosome 13) and average infection risk per cell ( $\gamma_c$ ), as derived from beta regression analysis. Point estimates of the intercept ( $\beta_0$ ), the regression coefficients associated to  $\psi_{Rc}$  and  $\gamma_c$ , and the precision parameter  $\phi$  are reported on the logit scale together with their standard errors (SE). *P*-values and odds ratios (OR) are shown for  $\beta_0$ ,  $\psi_{Rc}$ , and  $\gamma_c$ . <sup>a</sup>Odds ratio 95% confidence interval (CI), lower bound. <sup>b</sup>Odds ratio 95% CI, upper bound. Significant regression coefficients are highlighted with \*\*\* when their *p*-values (*p*) are  $\leq 0.001$ ; \*\* when  $0.001 < p \leq 0.01$ ; \* when  $0.01 < p \leq 0.05$ ; · when  $0.05 < p \leq 0.1$ . Significant coefficients are represented in bold.

**Table 2.** Muturu-Lohani comparison.

| Coefficient | Estimate | SE    | <i>p</i> -value | OR    | OR <sub>low</sub> | OR <sub>up</sub> |
|-------------|----------|-------|-----------------|-------|-------------------|------------------|
| $\beta_0$   | 0.935    | 0.196 | 1.73E-06***     | 2.547 | 1.735             | 3.740            |
| $\psi_{Rc}$ | 0.999    | 0.732 | 1.72E-01        | 2.716 | 0.647             | 11.401           |
| $\phi$      | 2.566    | 0.480 |                 |       |                   |                  |
| Coefficient | Estimate | SE    | <i>p</i> -value | OR    | OR <sub>low</sub> | OR <sub>up</sub> |
| $\beta_0$   | 1.012    | 0.471 | 3.16E-02*       | 2.751 | 1.093             | 6.925            |
| $\gamma_c$  | -0.481   | 1.680 | 7.75E-01        | 0.618 | 0.023             | 16.640           |
| $\phi$      | 2.164    | 0.389 |                 |       |                   |                  |

*Upper table:* association between Lohani ancestry at window 13 (chromosome 26) and  $\psi_{RC}$ , as derived from beta regression analysis. *Lower table:* association between Lohani ancestry at window 145 (chromosome 13) and  $\gamma_c$ , as derived from beta regression analysis. Column headings, acronyms and codes for statistical significance are the same described in Table 1.

**Table 3.** Hereford-Tharparkar comparison.

| Coefficient | Estimate      | SE    | <i>p-value</i>   | OR    | OR <sub>low</sub> | OR <sub>up</sub> |
|-------------|---------------|-------|------------------|-------|-------------------|------------------|
| $\beta_0$   | -0.429        | 0.208 | 3.93E-02*        | 0.651 | 0.433             | 0.979            |
| $\psi_{RC}$ | 1.360         | 0.814 | 9.46E-02·        | 3.896 | 0.790             | 19.210           |
| $\phi$      | 1.585         | 0.261 |                  |       |                   |                  |
| Coefficient | Estimate      | SE    | <i>p-value</i>   | OR    | OR <sub>low</sub> | OR <sub>up</sub> |
| $\beta_0$   | 1.879         | 0.483 | 1.00E-04***      | 6.547 | 2.540             | 16.872           |
| $\gamma_c$  | <b>-3.851</b> | 1.693 | <b>2.29E-02*</b> | 0.021 | 0.001             | 0.587            |
| $\phi$      | 2.205         | 0.399 |                  |       |                   |                  |

*Upper table:* association between Tharparkar ancestry at window 13 (chromosome 26) and  $\psi_{RC}$ , as derived from beta regression analysis. *Lower table:* association between Tharparkar ancestry at window 145 (chromosome 13) and  $\gamma_c$ , as derived from beta regression analysis. Column headings, acronyms and codes for statistical significance are the same described in Table 1.

**Table 4.** Hereford-Lohani comparison.

| Coefficient | Estimate | SE    | <i>p-value</i> | OR    | OR <sub>low</sub> | OR <sub>up</sub> |
|-------------|----------|-------|----------------|-------|-------------------|------------------|
| $\beta_0$   | 1.025    | 0.206 | 6.34E-07***    | 2.787 | 1.861             | 4.174            |
| $\psi_{RC}$ | 0.778    | 0.747 | 2.98E-01       | 2.177 | 0.504             | 9.413            |
| $\phi$      | 2.240    | 0.422 |                |       |                   |                  |
| Coefficient | Estimate | SE    | <i>p-value</i> | OR    | OR <sub>low</sub> | OR <sub>up</sub> |
| $\beta_0$   | 1.232    | 0.477 | 9.81E-03**     | 3.428 | 1.346             | 8.731            |
| $\gamma_c$  | -0.498   | 1.689 | 7.68E-01       | 0.608 | 0.022             | 16.650           |
| $\phi$      | 2.114    | 0.395 |                |       |                   |                  |

*Upper table:* association between Lohani ancestry at window 13 (chromosome 26) and  $\psi_{RC}$ , as derived from beta regression analysis. *Lower table:* association between Lohani ancestry at window 145 (chromosome 13) and  $\gamma_c$ , as derived from beta regression analysis. Column headings, acronyms and codes for statistical significance are the same described in Table 1.



## 2 Supplementary Figures and Tables

### 2.1 Supplementary Figures

#### 2.1.1 Supplementary Figure 1. Bioclimatic variables used in *Rhipicephalus appendiculatus* distribution model.

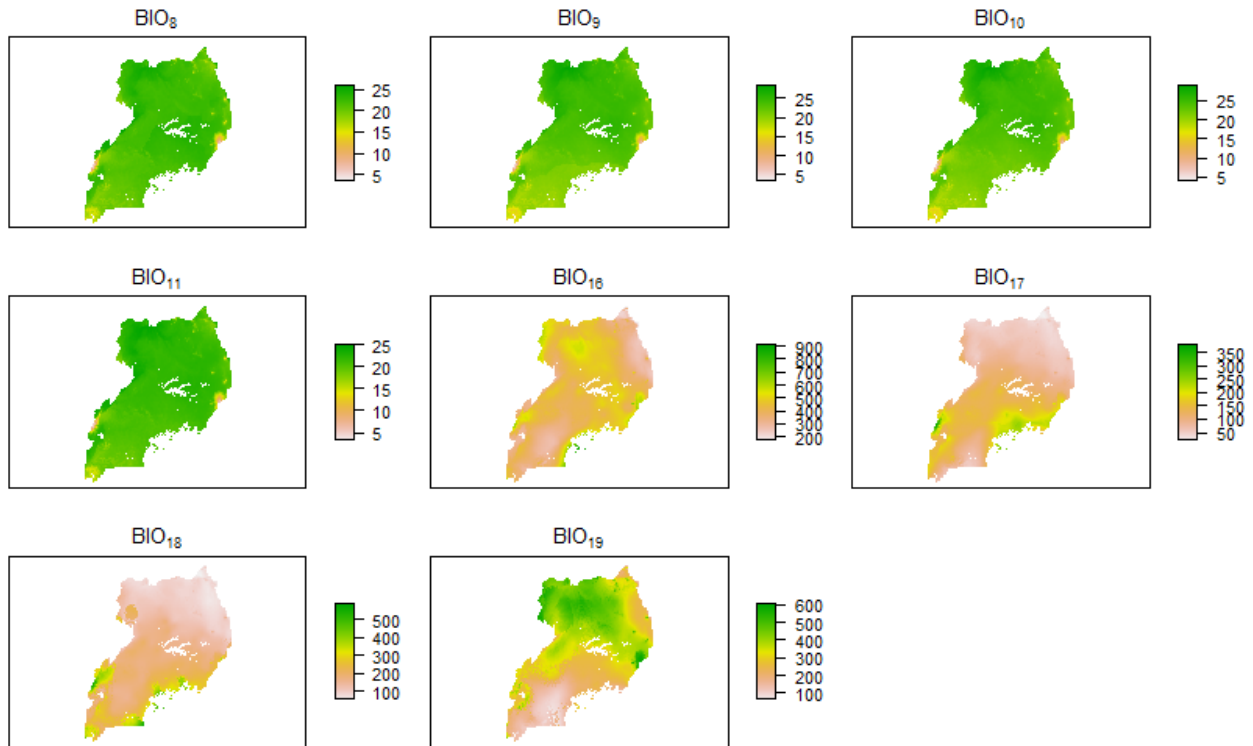

Bioclimatic variables used in *R. appendiculatus* distribution model. See Table 1 (main text) for details. BIO<sub>8</sub>, BIO<sub>9</sub>, BIO<sub>10</sub>, BIO<sub>11</sub> were transformed from decimal C° to C° prior analyses. BIO<sub>16</sub>, BIO<sub>17</sub>, BIO<sub>18</sub>, BIO<sub>19</sub> are expressed in millimetres.

### 2.1.2 Supplementary Figure 2. Selection of the annual period with NDVI values best explaining *Syncerus caffer* records.

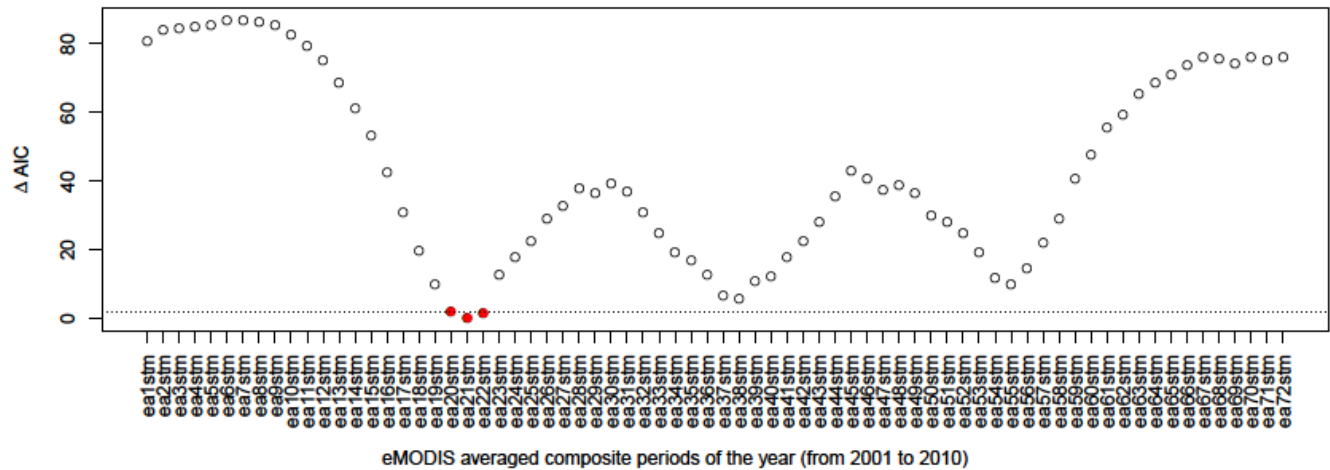

Seventy-two models were tested with Maxlike (Royle et al., 2012), one for each “eMODIS” annual period (or composite; see X-axis in the plot). Model performances were evaluated through the Akaike information criterion (AIC). Here,  $\Delta AIC$  values (Y-axis) are plotted representing the differences between the AIC values of the tested models and the AIC value of the best model. The model testing composite 21 (ea21stm; April 6-15) resulted the best one displaying a  $\Delta AIC=0$ . The horizontal dotted line corresponds to  $\Delta AIC=2$ , which is a suggested threshold to discriminate models with a performance comparable to the best one (Muscarella et al., 2014).  $\Delta AIC$  values of the best model and those  $<2$  are highlighted in red.

### 2.1.3 Supplementary Figure 3. Outlier detection in the infection risk model predictors.

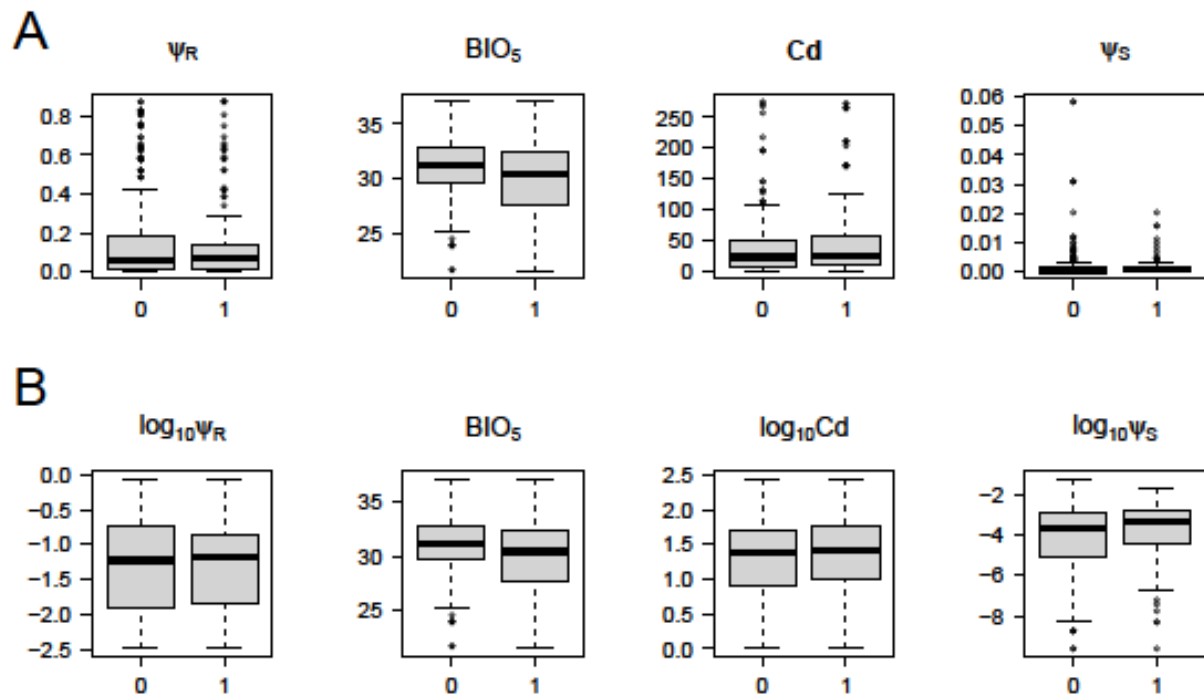

Predictors of the infection risk model were checked for the presence of outliers potentially influencing model parameters estimates. Each predictor was individually checked for the uninfected (0) and infected (1) animals through boxplot visualization (A). Outliers were defined as those values lying outside 1.5 times the interquartile range above the upper quartile and below the lower quartile.

After inspection,  $\psi_R$ , cattle density ( $Cd$ ) and  $\psi_S$  were transformed on the  $\log_{10}$  scale to reduce the potential leverage effect caused by the skewness of their distributions (B). Independent Mann-Whitney-Wilcoxon tests were performed to investigate significant differences between groups ( $H_0: \mu_0 = \mu_1$ ,  $\alpha=0.05$ ). A significant difference between the means of infected and uninfected animals for  $BIO_5$  ( $p\text{-value}=5.203E-05$ ) and  $\log_{10}(\psi_S)$  ( $p\text{-value}=0.0234$ ) was identified.

**2.1.4 Supplementary Figure 4. Additional ADMIXTURE analysis: results.**

This figure can be found in the Dryad Digital Repository ([doi:10.5061/dryad.sf5j2bf](https://doi.org/10.5061/dryad.sf5j2bf)); it depicts the results of the additional ADMIXTURE analysis described in Supplementary Text 3.

### 2.1.5 Supplementary Figure 5. Correlations between bioclimatic variables and principal components.

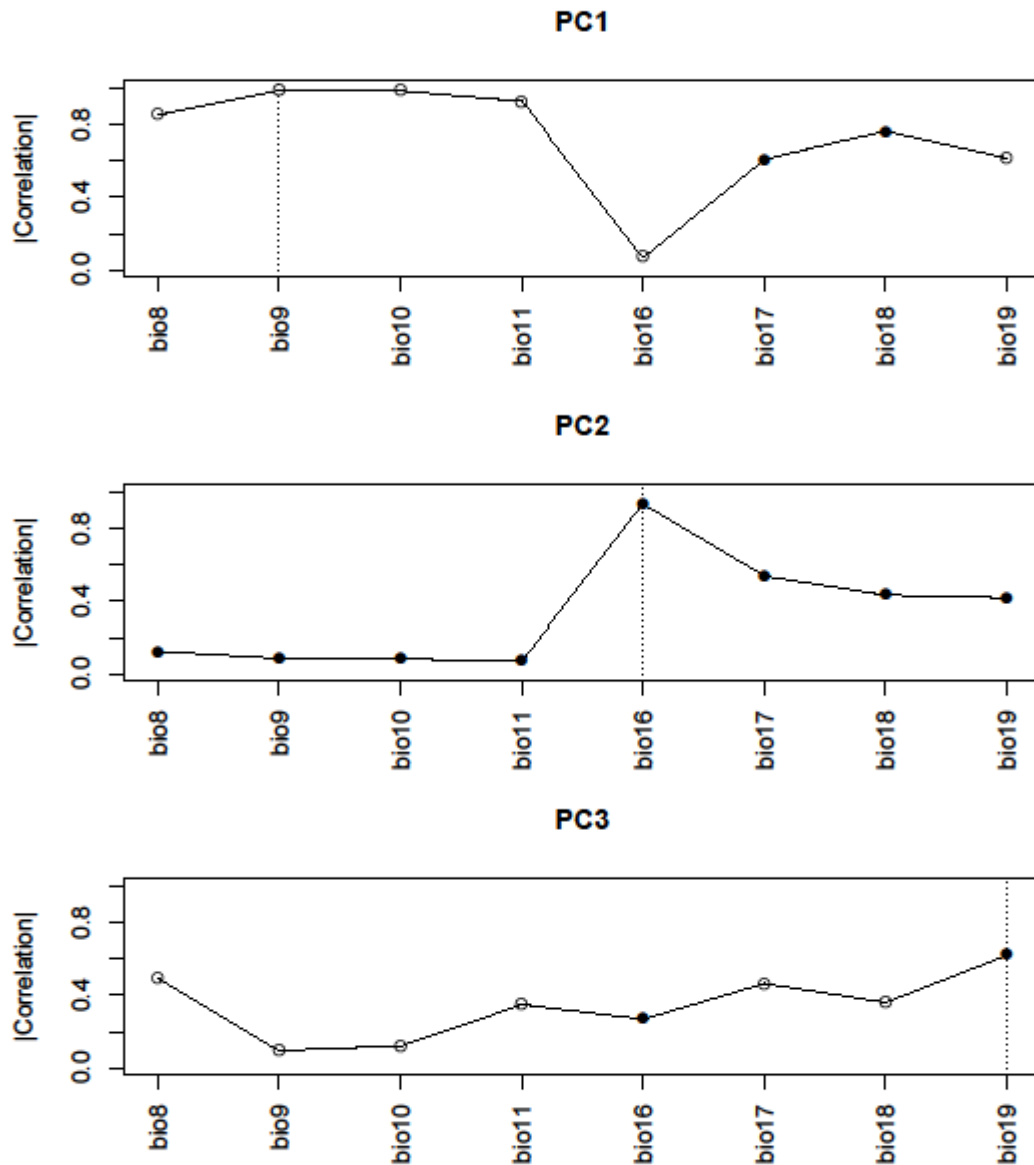

Absolute Pearson's product-moment correlation coefficients between first (**upper plot**), second (**in-between plot**) and third (**lower plot**) principal components and the original bioclimatic variables used to perform PCA. Filled and empty circles indicate positive and negative correlations, respectively. In order to ease interpretation of principal components, a vertical dashed line is positioned in correspondence of bioclimatic variable showing the highest correlation.

**2.1.6 Supplementary Figure 6. Candidate *Rhipicephalus appendiculatus* distribution models and model selection.**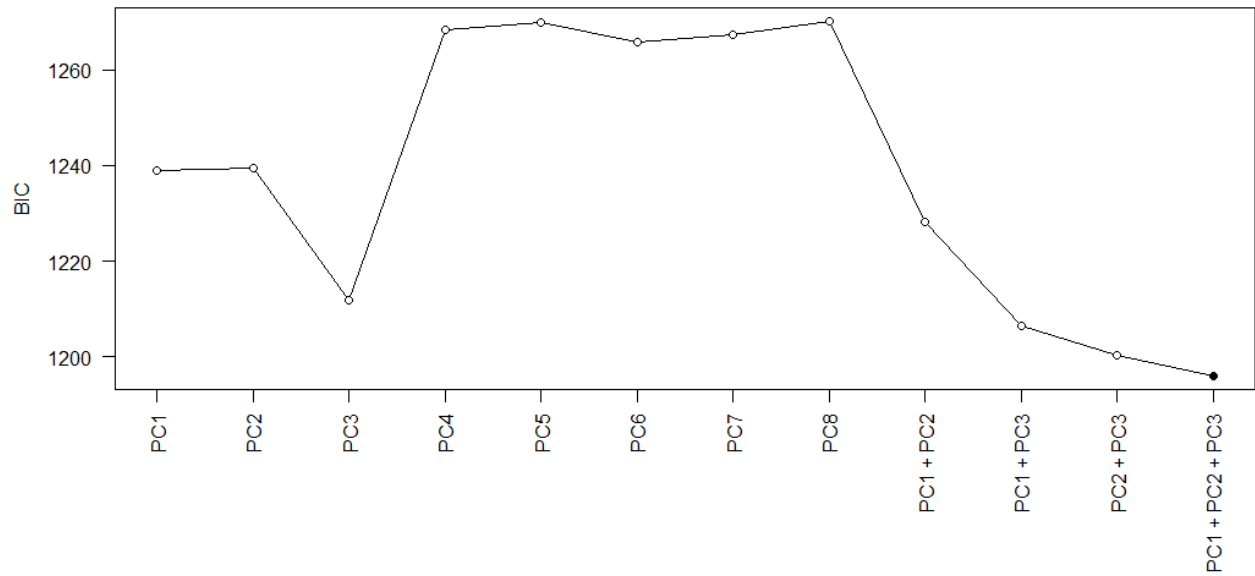

Twelve distribution models ( $X$ -axis) were tested to describe *R. appendiculatus* distribution in Uganda, and their performances evaluated based on the Bayesian information Criterion (BIC;  $Y$ -axis). The model including first ( $PC_1$ ), second ( $PC_2$ ) and third ( $PC_3$ ) principal components showed the lowest BIC value (filled circle in the plot), and was therefore retained to predict  $\psi_R$  over Uganda.

**2.1.7 Supplementary Figure 7. Selected *Rhipicephalus appendiculatus* distribution model with confidence intervals.**

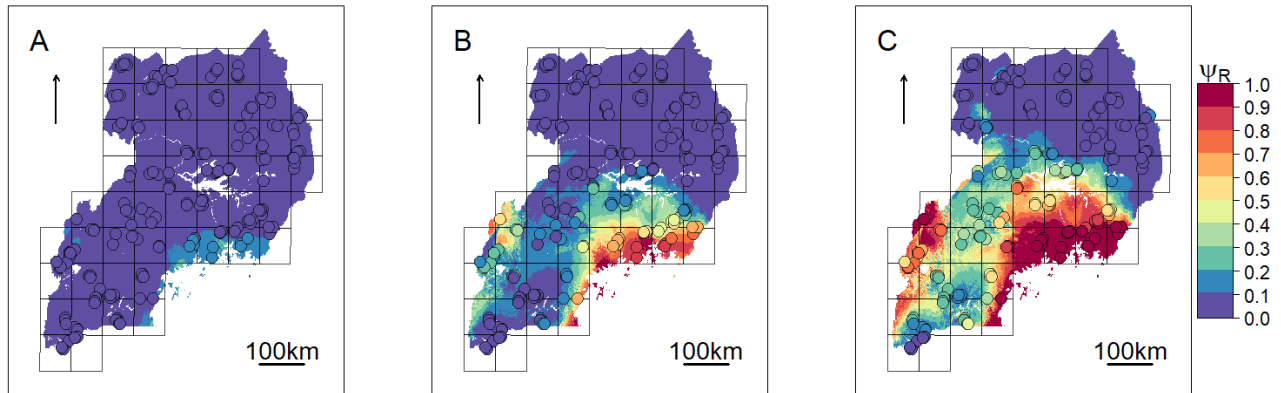

*R. appendiculatus* occurrence probability ( $\psi_R$ ) as derived from the selected distribution model (**B**) (see Supplementary Figure 6). Lower (**A**) and upper (**C**) bounds of the 95% confidence intervals around predicted  $\psi_R$  are reported. Colour key corresponds to predicted  $\psi_R$ , with increasing values from blue to red tones. Sampled farms are represented as circles, and coloured according to the  $\psi_R$  value estimated at their geographical location.

### 2.1.8 Supplementary Figure 8. Candidate *Syncerus caffer* distribution models and model selection.

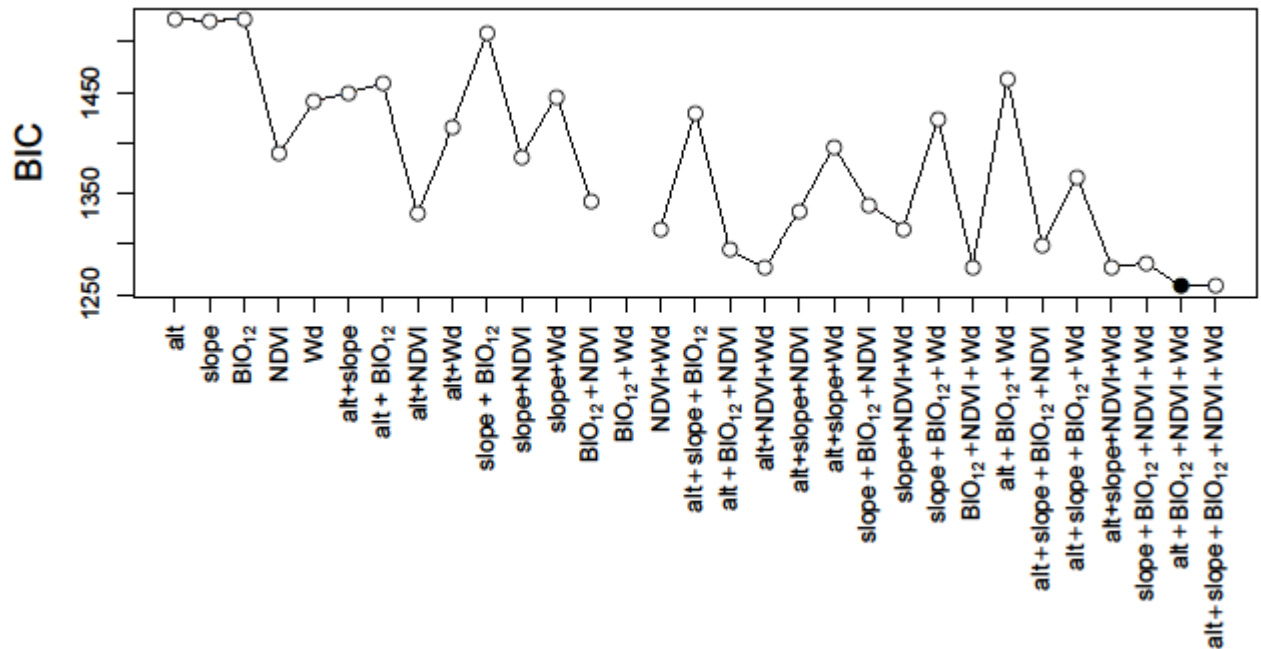

Thirty-one distribution models (X-axis) were tested to describe *S. caffer* distribution, and their performances evaluated based on the Bayesian information Criterion (BIC; Y-axis). The model including altitude (alt), annual precipitation (BIO<sub>12</sub>), NDVI, and distance from water (Wd) showed the lowest BIC value (filled circle in the plot), and was therefore retained to represent  $\psi_S$ . Model including BIO<sub>12</sub>+Wd failed to converge, and therefore it does not present any associated BIC.



**2.1.9 Supplementary Figure 9. Selected *Syncerus caffer* distribution model with confidence intervals.**

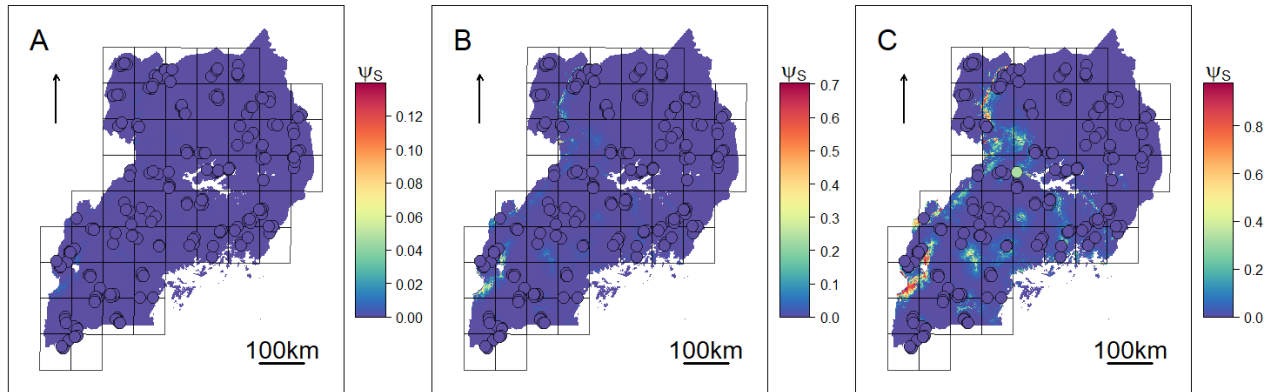

*S. caffer* occurrence probability ( $\psi_S$ ) as derived from the selected distribution model (**B**) (see Supplementary Figure 8). Lower (**A**) and upper (**C**) bounds of the 95% confidence intervals around predicted  $\psi_S$  are reported. Colour key corresponds to predicted  $\psi_S$ , with increasing values from blue to red tones. Sampled farms are represented as circles, and coloured according to the  $\psi_S$  value estimated at their geographical location.

**2.1.10 Supplementary Figure 10. Map of the Ugandan ancestry components ( $K=4$ ) as derived by ADMIXTURE analysis.**

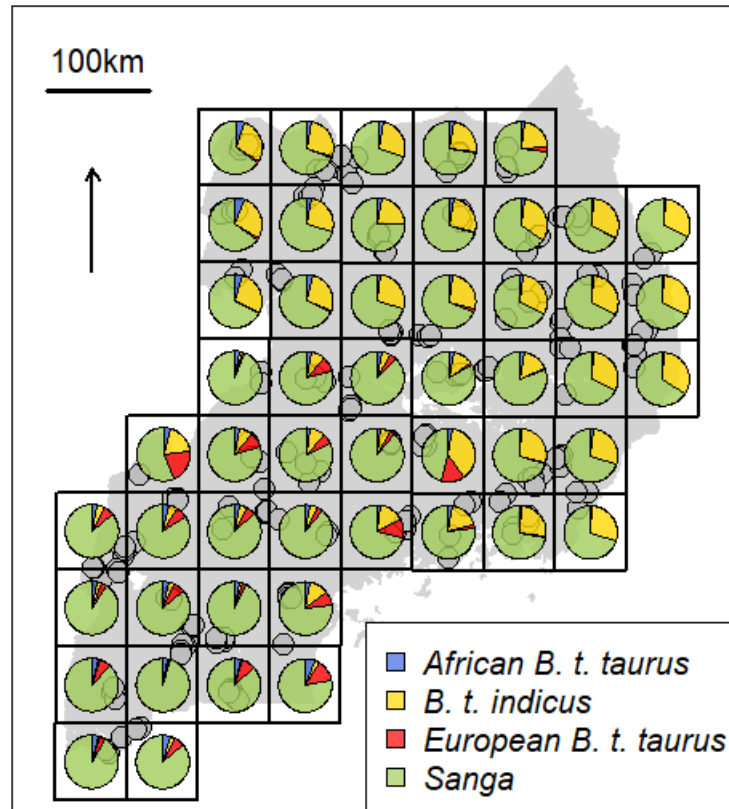

Global ancestry proportions for each cell at  $K=4$ , the cluster solution used to correct SAM $\beta$ ADA models (see Materials and Methods, main text). Each colour corresponds to a different ancestral gene pool, as inferred by ADMIXTURE analysis (i.e. African *B. t. taurus*, *B. t. indicus*, European *B. t. taurus* and sanga). Sanga and zebuine components appear to have a spatial structure, the sanga component (in green) being more present in south-western Uganda, and the zebuine component (in yellow) in the North-East. Sampled farms are represented as grey circles in the background.

**2.1.11 Supplementary Figure 11. Quantile-Quantile plots of the genotype-environment association studies ( $K=4$  correction).**

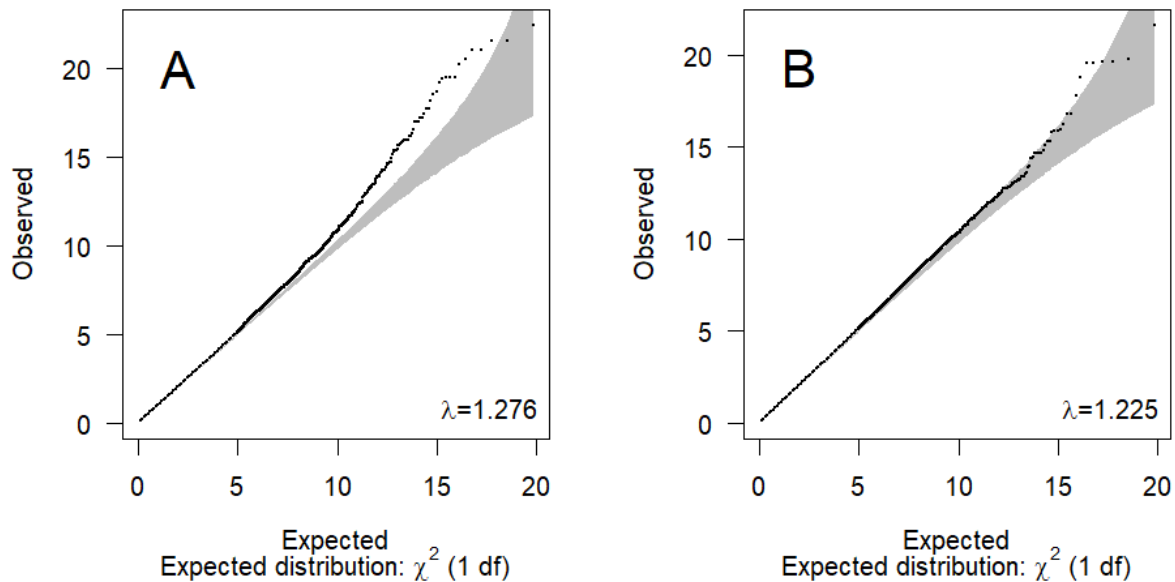

Quantile-Quantile plots of the genotype-environment association studies regarding  $\psi_R$  (**A**) and  $\gamma$  (**B**).

Each point is relative to a single likelihood ratio test. In particular,  $X$ -axis reports the sorted  $D$ -statistics as derived from a  $\chi^2$  distribution with one degree of freedom (i.e. the quantiles of the expected distribution of  $D$  values);  $Y$ -axis reports the quantiles of the observed distribution of  $D$  values. Observed  $D$  values from both the genotype-environment association studies were divided for their respective genomic inflation factor ( $\lambda$ ) prior plotting, in order to correct for overdispersion possibly due to unconsidered sources of bias. Genomic inflation factors (as reported in the bottom right corner of each plot) and Quantile-Quantile plots were calculated and produced with the function `qq.chisq` as embedded in the `snpStats` R package (Clayton, 2015). Overall, observed  $D$ -statistics from the  $\psi_R$  study suggest a higher divergence from the expectation than  $D$ -statistics from  $\gamma$  association study.

### 2.1.12 Supplementary Figure 12. Additional SAMβADA analysis ( $K=3$ and $K=16$ corrections): results.

#### Genotype-*R. appendiculatus* occurrence probability association study ( $K=3$ correction)

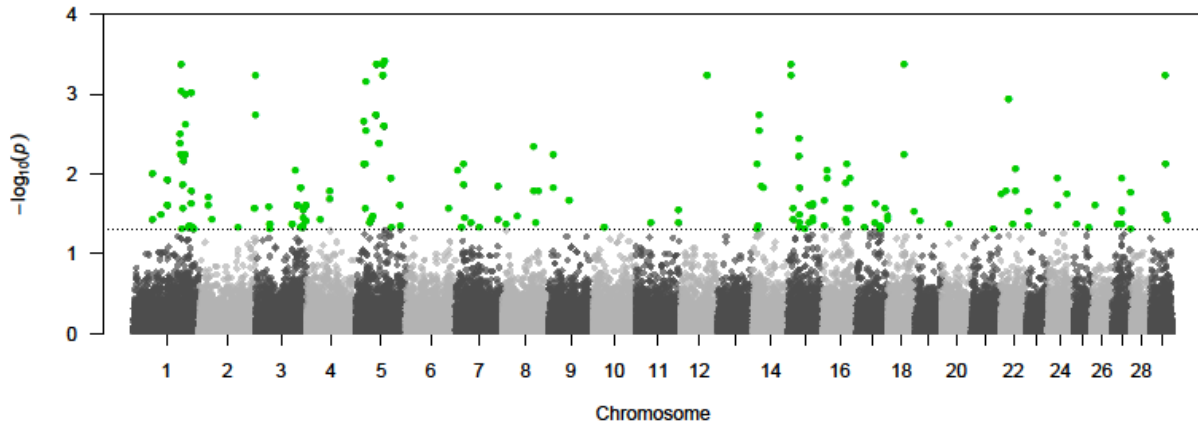

Manhattan plot of the genotype-*R. appendiculatus* occurrence probability ( $\psi_R$ ) association study for the  $K=3$  correction (refer to Supplementary Text 3 for an explanation). X-axis reports SNPs chromosomal positions on *B. taurus* chromosomes. On the Y-axis, the test statistic  $p$ -values ( $p$ ) of the associations with  $\psi_R$  are shown for each genotype, after the Benjamini-Hochberg (BH) correction, and on the  $-\log_{10}$  scale. Nominal significance threshold ( $\alpha_{BH}=0.05$ ) is displayed as a black dashed line, and significant  $p$ -values are represented in green. One hundred and twenty-nine SNPs resulted significantly associated with  $\psi_R$ . Thirty-eight of them resulted significantly associated also when the  $K=4$  correction was used. In particular, Locus BTA-113604 (with genotype AA) resulted from both  $K=3$  and  $K=4$  analyses, by confirming the association found with the  $K=4$  correction (see Table 5A, main text).

#### Genotype-*R. appendiculatus* occurrence probability association study ( $K=16$ correction)

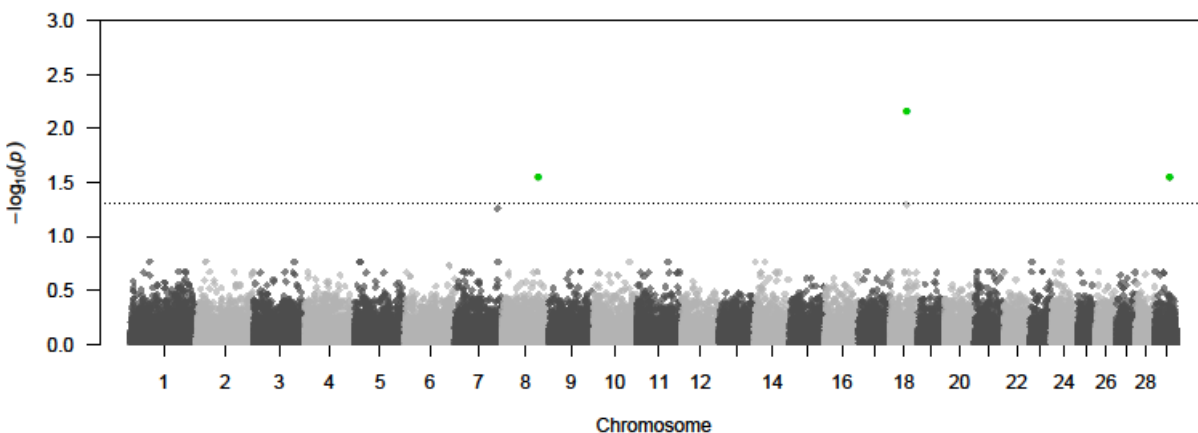

Manhattan plot of the genotype-*R. appendiculatus* occurrence probability ( $\psi_R$ ) association study for the  $K=16$  correction (refer to Supplementary Text 3 for an explanation). X-axis reports SNPs chromosomal positions on *B. taurus* chromosomes. On the Y-axis, the test statistic  $p$ -values ( $p$ ) of the associations with  $\psi_R$  are shown for each genotype, after the Benjamini-Hochberg (BH) correction,

and on the  $-\log_{10}$  scale. Nominal significance threshold ( $\alpha_{\text{BH}}=0.05$ ) is displayed as a black dashed line, and significant  $p$ -values are represented in green. Three SNPs resulted significantly associated; one of these (ARS-BFGL-NGS-18933, genotype AA, chromosome 29) was present also when the  $K=4$  correction was applied, being in linkage with *OPCML* (see Table 5A, main text). The other associated markers (ARS-BFGL-NGS-103237 and ARS-BFGL-BAC-6188, both with genotype AA) were not present in the set of SNPs resulting from the  $K=4$  correction.

### Genotype-*T. p. parva* infection risk association study ( $K=3$ correction)

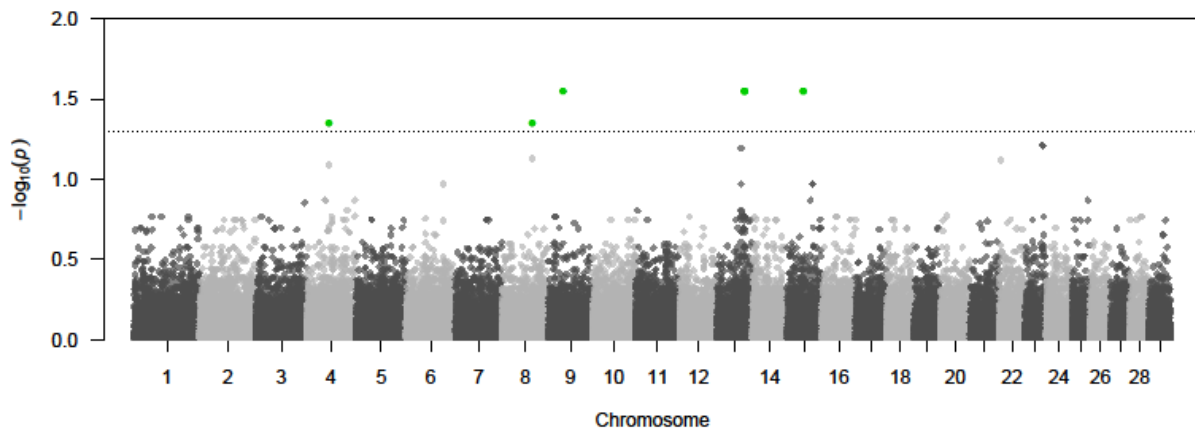

Manhattan plot of the genotype-*T. p. parva* infection risk ( $\gamma$ ) association study for the  $K=3$  correction (refer to Supplementary Text 3 for an explanation).  $X$ -axis reports SNPs chromosomal positions on *B. taurus* chromosomes. On the  $Y$ -axis, the test statistic  $p$ -values ( $p$ ) of the associations with  $\gamma$  are shown for each genotype, after the Benjamini-Hochberg (BH) correction, and on the  $-\log_{10}$  scale. Nominal significance threshold ( $\alpha_{\text{BH}}=0.05$ ) is displayed as a black dashed line, and significant  $p$ -values are represented in green. Eight SNPs resulted significantly associated with  $\gamma$ ; seven of them resulted significantly associated also when the  $K=4$  correction was used (see Table 5B, main text), by confirming findings obtained with the  $K=4$  correction.

### Genotype-*T. p. parva* infection risk association study ( $K=16$ correction)

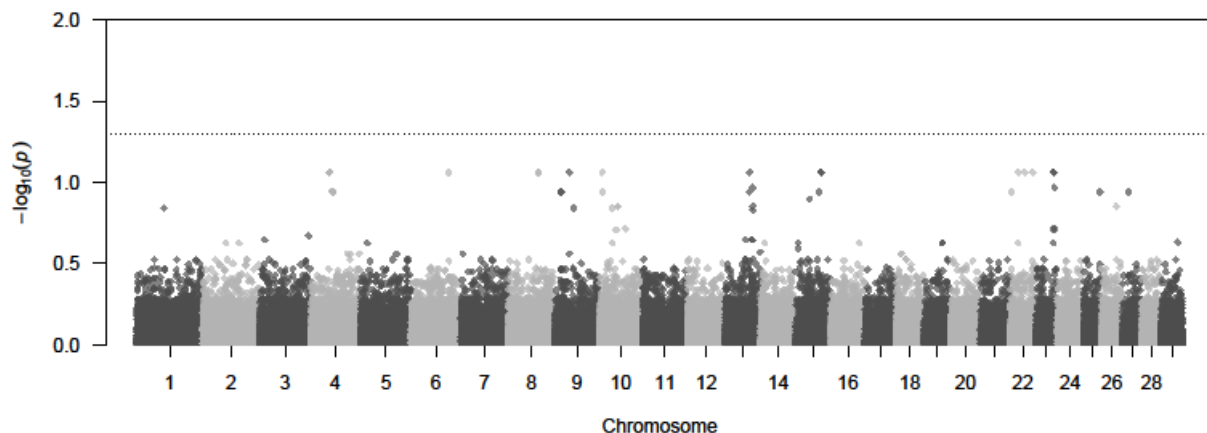

Manhattan plot of the genotype-*T. p. parva* infection risk ( $\gamma$ ) association study for the  $K=16$  correction (refer to Supplementary Text 3 for an explanation).  $X$ -axis reports SNPs chromosomal positions on *B. taurus* chromosomes. On the  $Y$ -axis, the test statistic  $p$ -values ( $p$ ) of the associations with  $\gamma$  are shown for each genotype, after the Benjamini-Hochberg (BH) correction, and on the  $-\log_{10}$  scale.

log10 scale. Nominal significance threshold ( $\alpha_{BH}=0.05$ ) is displayed as a black dashed line. No marker resulted significantly associated with the  $K=16$  correction.

### 2.1.13 Supplementary Figure 13. *PRKG1* and *SLA2* genomic regions.

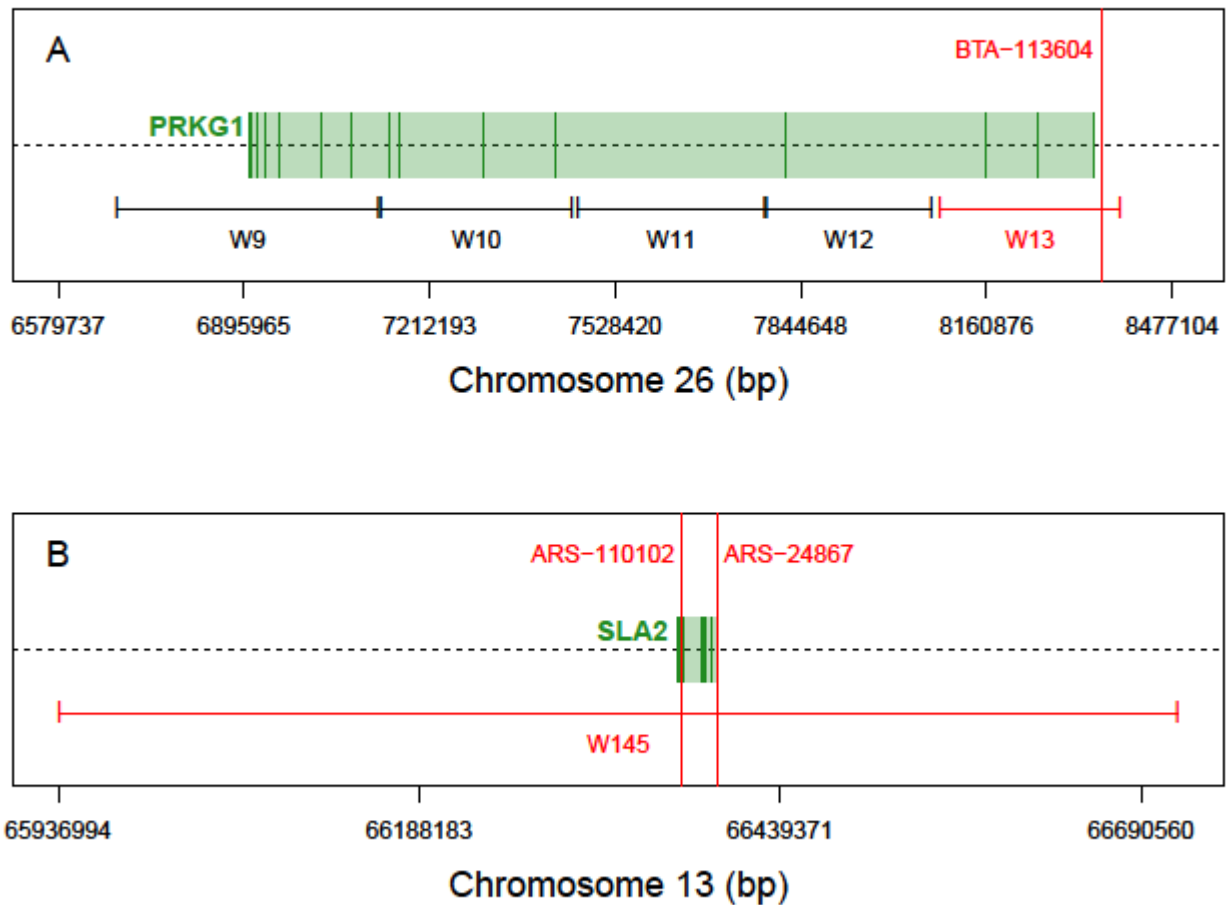

*PRKG1* and *SLA2* genomic regions on chromosome 26 (A) and 13 (B). Physical positions are reported in base pairs on the X-axis. Genes are represented as green rectangles with exons highlighted in dark green. Genomic windows (W) as derived from PCADMIX analysis are also shown in the lower half of each plot. SNPs in linkage disequilibrium with the candidate genes are highlighted by vertical red lines representing their physical position; particularly, BTA-113604 falls within window 13 (position: 8,081,039-8,388,710 bps) on chromosome 26, while ARS-110102 and ARS-24867 within window 145 (positions: 65,937,994-66,715,966 bps) on chromosome 13. The gene name is also shown in red.

### 2.1.14 Supplementary Figure 14. Spatial representation of PCADMIX assignments (Tharparkar/Muturu comparison).

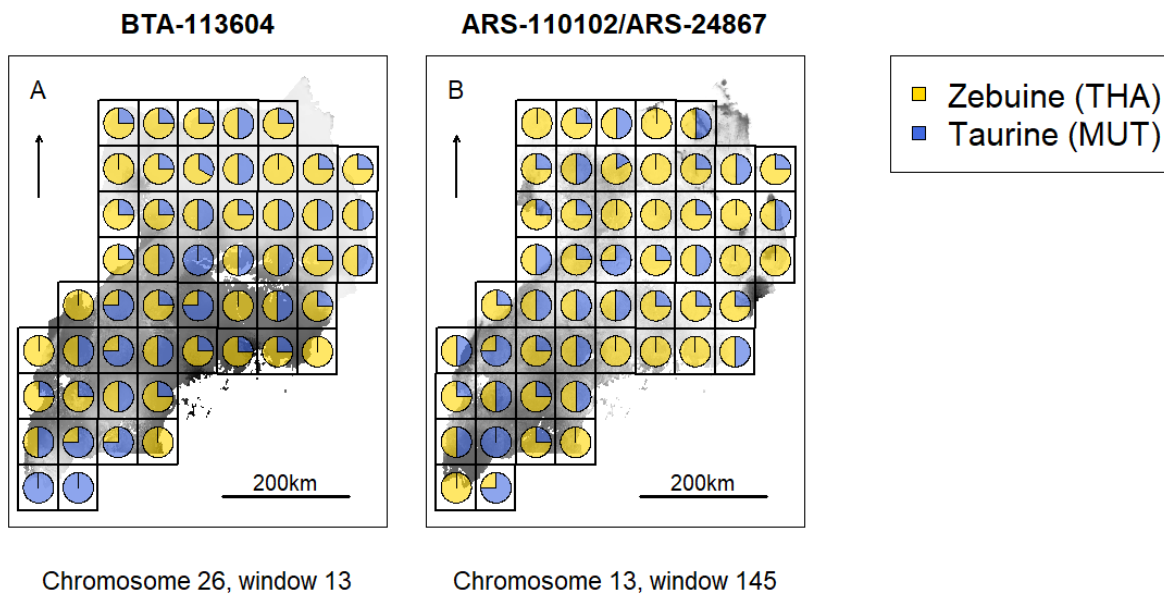

PCADMIX results obtained using Tharparkar (THA) and Muturu (MUT) as references. Pie charts show zebuine (i.e. *B. t. indicus*; THA) and African taurine (i.e. *B. t. taurus*; MUT) proportions per sampling cell (in yellow and blue, respectively) for window 13 on chromosome 26 (**A**), and windows 145 on chromosome 13 (**B**). These genomic windows host the SNPs in linkage disequilibrium with *PRKG1* (i.e. BTA-113604) and *SLA2* (i.e. ARS-110102 and ARS-24867). *R. appendiculatus* occurrence probability (**A**) and *T. p. parva* infection risk (**B**) are represented on the background.



## 2.2 Supplementary Tables

### 2.2.1 Supplementary Table 1. Composition of the population structure dataset (PSD).

| Breed name  | Type                         | N          | Origin                             | Source                                                                                                                  |
|-------------|------------------------------|------------|------------------------------------|-------------------------------------------------------------------------------------------------------------------------|
| Holstein    | European <i>B. t. taurus</i> | 50         | Europe                             | Decker et al. (2009, 2014); McTavish et al. (2013); The Bovine HapMap Consortium et al. (2009)                          |
| Jersey      | European <i>B. t. taurus</i> | 31         | Europe                             | Decker et al. (2009, 2014); McTavish et al. (2013); The Bovine HapMap Consortium et al. (2009)                          |
| Hereford    | European <i>B. t. taurus</i> | 50         | Europe                             | Decker et al., (2009, 2014); Gautier et al., (2010); McTavish et al. (2013); The Bovine HapMap Consortium et al. (2009) |
| Baoule      | African <i>B. t. taurus</i>  | 29         | Africa (Burkina Faso)              | Decker et al. (2014); Gautier et al. (2009)                                                                             |
| Lagune      | African <i>B. t. taurus</i>  | 30         | Africa (Benin)                     | Decker et al. (2014); Gautier et al. (2009)                                                                             |
| N'Dama      | African <i>B. t. taurus</i>  | 56         | Africa (Ivory Coast, Burkina Faso) | Decker et al. (2014); Gautier et al. (2009, 2010)                                                                       |
| Somba       | African <i>B. t. taurus</i>  | 30         | Africa (Togo)                      | Decker et al. (2014); Gautier et al. (2009)                                                                             |
| Muturu      | African <i>B. t. taurus</i>  | 13         | Africa (Nigeria)                   | S <sup>a</sup>                                                                                                          |
| -           | <b>Sanga</b>                 | <b>743</b> | <b>Africa (Uganda)</b>             | <b>NEXTGEN project</b>                                                                                                  |
| Zebu Bororo | Sanga                        | 23         | Africa (Chad)                      | Decker et al. (2014); Gautier et al. (2010)                                                                             |
| Zebu Fulani | Sanga                        | 30         | Africa (Benin)                     | Decker et al. (2014); Gautier et al. (2009)                                                                             |
| Boran       | Sanga                        | 44         | Africa (Ethiopia)                  | Decker et al. (2014); McTavish et al. (2013)                                                                            |
| Red Bororo  | Sanga                        | 4          | Africa (Nigeria)                   | S                                                                                                                       |

|                  |                      |    |                        |                                                                                                                       |
|------------------|----------------------|----|------------------------|-----------------------------------------------------------------------------------------------------------------------|
| Sokoto Gudali    | Sanga                | 6  | Africa (Nigeria)       | S                                                                                                                     |
| Nganda           | Sanga                | 19 | Africa (Uganda)        | SH <sup>b</sup>                                                                                                       |
| Sahiwal          | Sanga                | 21 | Africa (Kenya/Uganda)  | SH                                                                                                                    |
| Serere/Teso Zebu | Sanga                | 15 | Africa(Uganda)         | SH                                                                                                                    |
| Yakanaji         | Sanga                | 13 | Africa (Nigeria)       | S                                                                                                                     |
| Bunaji           | Sanga                | 4  | Africa (Nigeria)       | S                                                                                                                     |
| Karakioja        | Sanga                | 16 | Africa(Uganda)         | SH                                                                                                                    |
| Sahiwal          | <i>B. t. indicus</i> | 17 | Asia (Pakistan)        | Decker et al. (2009, 2014); McTavish et al. (2013)                                                                    |
| Gir              | <i>B. t. indicus</i> | 26 | Asia (India)           | Decker et al. (2009, 2014); Gautier et al. (2010); McTavish et al. (2013); The Bovine HapMap Consortium et al. (2009) |
| Tharparkar       | <i>B. t. indicus</i> | 25 | Asia (Pakistan)        | Decker et al. (2014); S                                                                                               |
| Kankraj          | <i>B. t. indicus</i> | 10 | Asia (India)           | Decker et al. (2014)                                                                                                  |
| Nelore           | <i>B. t. indicus</i> | 50 | South America (Brazil) | Decker et al.(2009, 2014); Gautier et al., (2010); McTavish et al. (2013); The Bovine HapMap Consortium et al. (2009) |

Table reports breeds' names (Breed name), *B. taurus* subspecies (Type), sample size (N), geographical origin (Origin), and data source (Source). Ugandan population from the NEXTGEN project is reported in bold. <sup>a</sup>Genotypes provided by T. Sonstegard; <sup>b</sup>Genotypes provided by T. Sonstegard and H. J. Huson.

**2.2.2 Supplementary Table 2.** SAM $\beta$ ADA analysis ( $K=4$  correction): significant associations with *Rhipicephalus appendiculatus* occurrence probability after correction for multiple testing.

| SNP ID (genotype)                    | Chr | Position  | $D$    | $p_{BH}$ | $\beta_0$ | $\psi_R$ | PC <sub>1</sub> | PC <sub>2</sub> | PC <sub>3</sub> |
|--------------------------------------|-----|-----------|--------|----------|-----------|----------|-----------------|-----------------|-----------------|
| ARS-BFGL-NGS-18933 (GG)              | 29  | 34650967  | 28.607 | 0.005    | -9.272    | 10.365   | -1.401          | -0.705          | -1.344          |
| Hapmap51626-BTA-73514 (AA)           | 5   | 48834486  | 27.442 | 0.005    | 6.036     | -6.006   | 0.085           | 0.804           | -0.996          |
| Hapmap51626-BTA-73514 (AG)           | 5   | 48834486  | 27.442 | 0.005    | -6.036    | 6.006    | -0.085          | -0.804          | 0.996           |
| Hapmap51479-BTA-66720 (GG)           | 5   | 64330943  | 26.833 | 0.005    | 4.877     | -4.676   | 0.106           | 0.864           | -0.941          |
| Hapmap55537-rs29016129 (GG)          | 5   | 64380551  | 26.833 | 0.005    | 4.877     | -4.676   | 0.106           | 0.864           | -0.941          |
| BTA-46975-no-rs (GG)                 | 5   | 68220538  | 26.173 | 0.006    | 5.986     | -5.557   | 0.123           | 0.761           | -1.57           |
| BTA-46975-no-rs (CG)                 | 5   | 68220538  | 25.759 | 0.007    | -6.226    | 5.793    | -0.221          | -0.719          | 1.657           |
| ARS-BFGL-NGS-11580 (CC)              | 1   | 114981065 | 24.841 | 0.007    | 4.508     | -4.133   | 0.04            | 0.78            | -1.166          |
| Hapmap51479-BTA-66720 (AG)           | 5   | 64330943  | 24.812 | 0.007    | -4.953    | 4.641    | -0.178          | -0.763          | 0.966           |
| Hapmap55537-rs29016129 (AG)          | 5   | 64380551  | 24.812 | 0.007    | -4.953    | 4.641    | -0.178          | -0.763          | 0.966           |
| ARS-BFGL-BAC-6188 (AA)               | 18  | 38850678  | 24.747 | 0.007    | 1.214     | -2.049   | 0.439           | -0.242          | -0.185          |
| Hapmap50589-BTA-119599 (AG)          | 15  | 7989843   | 24.477 | 0.007    | -5.226    | 4.821    | -0.226          | -0.617          | 1.279           |
| Hapmap36616-SCAFFOLD310212_1822 (AA) | 5   | 23171537  | 23.856 | 0.01     | 5.786     | -5.456   | -0.283          | 0.611           | -0.936          |
| UA-IFASA-6140 (AA)                   | 7   | 102472846 | 23.646 | 0.01     | 2.733     | 6.062    | 0.525           | -0.028          | -0.434          |
| Hapmap50589-BTA-119599 (GG)          | 15  | 7989843   | 23.15  | 0.012    | 5.089     | -4.606   | 0.177           | 0.66            | -1.192          |
| BTB-00839408 (AG)                    | 22  | 18978658  | 22.586 | 0.014    | -5.983    | 5.685    | -0.336          | -0.611          | 1.113           |
| BTB-00839408 (AA)                    | 22  | 18978658  | 22.586 | 0.014    | 5.983     | -5.685   | 0.336           | 0.611           | -1.113          |
| UA-IFASA-5221 (GG)                   | 5   | 18739471  | 22.267 | 0.016    | 4.807     | -4.386   | 0.354           | 0.745           | -0.85           |
| Hapmap34056-BES2_Contig421_810 (AG)  | 1   | 138178130 | 21.966 | 0.017    | -5.527    | 4.947    | 0.21            | -0.618          | 1.091           |
| Hapmap34056-BES2_Contig421_810 (GG)  | 1   | 138178130 | 21.966 | 0.017    | 5.527     | -4.947   | -0.21           | 0.618           | -1.091          |
| ARS-BFGL-NGS-11580 (AC)              | 1   | 114981065 | 21.685 | 0.017    | -4.559    | 3.954    | -0.009          | -0.757          | 1.205           |
| Hapmap57868-rs29020458 (AA)          | 24  | 22746291  | 21.675 | 0.017    | -1.163    | 1.855    | 0.362           | -0.089          | -0.068          |
| BTA-97369-no-rs (GG)                 | 14  | 25887784  | 21.641 | 0.017    | -0.459    | -1.964   | 0.071           | -0.116          | 0.252           |
| BTB-00292673 (AA)                    | 7   | 4953801   | 21.101 | 0.022    | -69.144   | 86.381   | 5.517           | -8.483          | 4.851           |
| ARS-BFGL-BAC-6188 (CC)               | 18  | 38850678  | 20.782 | 0.024    | -4.248    | 3.811    | -0.445          | 0.796           | -0.287          |
| BTB-01283856 (AG)                    | 12  | 65131442  | 20.666 | 0.024    | -5.301    | 4.578    | -0.001          | -0.099          | 1.392           |
| BTB-01283856 (GG)                    | 12  | 65131442  | 20.666 | 0.024    | 5.301     | -4.578   | 0.001           | 0.099           | -1.392          |
| BTB-01058465 (GG)                    | 1   | 113745976 | 20.318 | 0.025    | 3.954     | -3.511   | 0.297           | 0.859           | -0.806          |
| BTB-01058465 (AG)                    | 1   | 113745976 | 20.318 | 0.025    | -3.954    | 3.511    | -0.297          | -0.859          | 0.806           |

## Supplementary Material

|                                          |    |           |        |       |        |        |        |        |        |
|------------------------------------------|----|-----------|--------|-------|--------|--------|--------|--------|--------|
| ARS-BFGL-NGS-37845 (AG)                  | 5  | 48633731  | 20.308 | 0.025 | -6.562 | 5.87   | -0.594 | -0.713 | 1.572  |
| ARS-BFGL-NGS-37845 (AA)                  | 5  | 48633731  | 20.308 | 0.025 | 6.562  | -5.87  | 0.594  | 0.713  | -1.572 |
| ARS-BFGL-NGS-103237 (AA)                 | 8  | 87067969  | 20.231 | 0.026 | -9.864 | -48.49 | -0.672 | -0.203 | 0.69   |
| ARS-BFGL-NGS-37889 (AA)                  | 9  | 10370879  | 20.168 | 0.026 | 4.558  | -4.002 | 0.293  | 0.762  | -0.821 |
| BTB-01109852 (AG)                        | 14 | 15585398  | 20.056 | 0.026 | -4.562 | 3.955  | -0.256 | -0.425 | 1.102  |
| ARS-BFGL-NGS-32909 (CC)                  | 5  | 67846632  | 19.931 | 0.027 | 4.744  | -4.092 | 0.142  | 0.637  | -1.042 |
| ARS-BFGL-NGS-32909 (AC)                  | 5  | 67846632  | 19.931 | 0.027 | -4.744 | 4.092  | -0.142 | -0.637 | 1.042  |
| UA-IFASA-6140 (AG)                       | 7  | 102472846 | 19.716 | 0.029 | -2.708 | -5.334 | -0.492 | 0.047  | 0.373  |
| Hapmap36616-<br>SCAFFOLD310212_1822 (AG) | 5  | 23171537  | 19.639 | 0.029 | -5.793 | 5.087  | 0.331  | -0.57  | 1.031  |
| Hapmap50904-BTA-17187 (AA)               | 1  | 124692274 | 19.632 | 0.029 | 2.619  | -2.313 | -0.255 | -0.074 | -0.531 |
| ARS-BFGL-NGS-402 (GG)                    | 29 | 35698376  | 19.561 | 0.029 | 2.169  | -2.178 | -0.14  | 0.476  | -0.448 |
| ARS-BFGL-NGS-110339 (AA)                 | 1  | 111495891 | 19.521 | 0.029 | 3.467  | -3.013 | 0.029  | 0.676  | -0.91  |
| ARS-BFGL-NGS-11845 (AA)                  | 27 | 21512601  | 19.276 | 0.032 | 5.262  | -4.664 | 0.309  | 0.848  | -0.671 |
| ARS-BFGL-NGS-16947 (AA)                  | 15 | 26629340  | 19.053 | 0.035 | 4.868  | -3.985 | -0.298 | 0.815  | -1.086 |
| Hapmap39895-BTA-15668 (CC)               | 5  | 13311842  | 18.725 | 0.039 | 5.563  | -5.094 | -0.131 | 1.103  | 0.437  |
| Hapmap39895-BTA-15668 (AC)               | 5  | 13311842  | 18.725 | 0.039 | -5.563 | 5.094  | 0.131  | -1.103 | -0.437 |
| ARS-BFGL-NGS-110339 (AC)                 | 1  | 111495891 | 18.669 | 0.039 | -3.509 | 2.979  | -0.004 | -0.678 | 0.938  |
| BTB-01956180 (AG)                        | 27 | 43656445  | 18.664 | 0.039 | -0.987 | 1.695  | -0.024 | -0.098 | 0.052  |
| UA-IFASA-5221 (AG)                       | 5  | 18739471  | 18.645 | 0.039 | -4.779 | 4.093  | -0.336 | -0.723 | 0.883  |
| ARS-BFGL-NGS-99064 (AA)                  | 1  | 44813737  | 18.587 | 0.039 | 0.351  | 1.763  | -0.395 | 0.087  | -0.013 |
| ARS-BFGL-NGS-63882 (GG)                  | 2  | 135994305 | 18.376 | 0.043 | 6.945  | -5.619 | 0.37   | 0.159  | -2.585 |
| Hapmap34409-<br>BES7_Contig244_858 (AA)  | 1  | 120149924 | 18.213 | 0.044 | 4.258  | -3.515 | -0.082 | 0.758  | -0.907 |
| Hapmap39826-BTA-37247 (CC)               | 15 | 12975036  | 18.186 | 0.044 | 3.195  | -2.786 | -0.253 | 0.356  | 0.025  |
| ARS-BFGL-NGS-39898 (GG)                  | 22 | 1319636   | 18.165 | 0.044 | -0.475 | -1.802 | 0.035  | -0.127 | 0.116  |
| Hapmap39826-BTA-37247 (AC)               | 15 | 12975036  | 18.157 | 0.044 | -3.232 | 2.795  | 0.251  | -0.334 | 0.073  |
| ARS-BFGL-NGS-16947 (AC)                  | 15 | 26629340  | 18.155 | 0.044 | -4.84  | 3.928  | 0.295  | -0.786 | 0.991  |
| Hapmap50904-BTA-17187 (AG)               | 1  | 124692274 | 18.126 | 0.044 | -2.614 | 2.241  | 0.255  | 0.078  | 0.483  |
| BTA-113604-no-rs (AA)                    | 26 | 8356096   | 18.024 | 0.046 | -7.089 | 6.883  | -1.157 | -0.404 | 0.252  |
| BTA-60607-no-rs (AA)                     | 25 | 6742260   | 17.967 | 0.046 | -0.823 | -1.996 | -0.207 | 0.045  | 0.123  |
| Hapmap31116-BTA-143121<br>(AA)           | 8  | 75973285  | 17.854 | 0.048 | 2.105  | -1.974 | -0.362 | -0.215 | -0.157 |
| ARS-BFGL-NGS-104610 (AG)                 | 11 | 104293559 | 17.742 | 0.049 | -0.272 | -1.7   | -0.127 | 0.078  | 0.192  |

|                            |    |          |        |       |          |        |        |        |        |
|----------------------------|----|----------|--------|-------|----------|--------|--------|--------|--------|
| Hapmap51155-BTA-11643 (AA) | 24 | 38086180 | 17.721 | 0.049 | -364.868 | 501.77 | 24.71  | -32.84 | 27.863 |
| ARS-BFGL-NGS-37889 (AT)    | 9  | 10370879 | 17.695 | 0.049 | -4.551   | 3.821  | -0.281 | -0.767 | 0.788  |
| ARS-BFGL-BAC-31319 (AA)    | 23 | 4847028  | 17.683 | 0.049 | -0.973   | -2.1   | -0.238 | -0.131 | 0.184  |

For each SNP (and genotype), the chromosome (Chr), physical position in base pairs (Position), the Likelihood Ratio test statistic ( $D$ ), and the  $p$ -value associated with  $D$  after multiple testing correction ( $p_{BH}$ ) are shown. Regression coefficients of the alternative models as estimated by SAM $\beta$ ADA are also reported, i.e. the model intercept ( $\beta_0$ ), the coefficient associated with tick occurrence probability ( $\psi_R$ ), and the coefficients associated with the population structure predictors (PC1, PC2 and PC3, respectively). Regression coefficients are expressed on the logit scale, and associations are sorted for decreasing values of the  $D$ -statistics.

2.2.3 **Supplementary Table 3.** SAM $\beta$ ADA analysis ( $K=4$  correction): significant associations with *Theileria parva parva* infection risk after correction for multiple testing.

| SNP ID (genotype)          | Chr | Position | $D$    | $p_{\text{BH}}$ | $\beta_0$ | $\gamma$ | PC <sub>1</sub> | PC <sub>2</sub> | PC <sub>3</sub> |
|----------------------------|-----|----------|--------|-----------------|-----------|----------|-----------------|-----------------|-----------------|
| ARS-BFGL-NGS-112656 (AA)   | 13  | 66336246 | 26.507 | 0.019           | 1.799     | -7.131   | -0.295          | 0.282           | -0.032          |
| ARS-BFGL-NGS-110102 (GG)   | 13  | 66370867 | 24.254 | 0.019           | 1.76      | -6.748   | -0.263          | 0.286           | -0.018          |
| BTA-33234-no-rs (GG)       | 13  | 66291997 | 24.06  | 0.019           | 1.889     | -6.881   | -0.239          | 0.286           | -0.044          |
| ARS-BFGL-NGS-24867 (AA)    | 13  | 66395465 | 24.045 | 0.019           | 1.824     | -6.785   | -0.236          | 0.244           | -0.121          |
| Hapmap39482-BTA-36746 (CC) | 15  | 40279014 | 24.01  | 0.019           | 5.452     | -17.615  | -1.162          | 0.495           | -0.622          |
| Hapmap39482-BTA-36746 (AC) | 15  | 40279014 | 24.01  | 0.019           | -5.452    | 17.615   | 1.162           | -0.495          | 0.622           |
| BTB-00384802 (AA)          | 9   | 34050782 | 23.05  | 0.027           | -0.42     | -6.085   | 0.05            | -0.074          | 0.056           |
| BTB-01298953 (AA)          | 4   | 54930726 | 21.786 | 0.045           | 1.243     | 6.926    | 0.166           | 0.171           | -0.249          |

For each SNP (and genotype), the chromosome (Chr), physical position in base pairs (Position), the Likelihood Ratio test statistic ( $D$ ), and the  $p$ -value associated with  $D$  after multiple testing correction ( $p_{\text{BH}}$ ) are shown. Regression coefficients of the alternative models as estimated by SAM $\beta$ ADA are also reported, i.e. the model intercept ( $\beta_0$ ), the coefficient associated with *T. p. parva* infection risk ( $\gamma$ ), and the coefficients associated with the population structure predictors (PC1, PC2 and PC3, respectively). Regression coefficients are expressed on the logit scale, and associations are sorted for decreasing values of the  $D$ -statistics.

### 3 References

- Barbato, M., Hailer, F., Orozco-terWengel, P., Kijas, J., Mereu, P., Cabras, P., et al. (2017). Genomic signatures of adaptive introgression from European mouflon into domestic sheep. *Sci. Rep.* 7. doi:10.1038/s41598-017-07382-7.
- Budde, M. (2018). [EXTERNAL] FEWS Contact Form | Data & Science Support.
- Clayton, D. (2015). *snpStats: SnpMatrix and XSnpMatrix classes and methods*. R package version 1.28.0.
- Decker, J. E., McKay, S. D., Rolf, M. M., Kim, J., Molina Alcalá, A., Sonstegard, T. S., et al. (2014). Worldwide Patterns of Ancestry, Divergence, and Admixture in Domesticated Cattle. *PLoS Genet.* 10, e1004254. doi:10.1371/journal.pgen.1004254.
- Decker, J. E., Pires, J. C., Conant, G. C., McKay, S. D., Heaton, M. P., Chen, K., et al. (2009). Resolving the evolution of extant and extinct ruminants with high-throughput phylogenomics. *Proc. Natl. Acad. Sci.* 106, 18644–18649.
- Gautier, M., Flori, L., Riebler, A., Jaffrézic, F., Laloë, D., Gut, I., et al. (2009). A whole genome Bayesian scan for adaptive genetic divergence in West African cattle. *BMC Genomics* 10, 550. doi:10.1186/1471-2164-10-550.
- Gautier, M., Laloë, D., and Moazami-Goudarzi, K. (2010). Insights into the Genetic History of French Cattle from Dense SNP Data on 47 Worldwide Breeds. *PLoS ONE* 5, e13038. doi:10.1371/journal.pone.0013038.
- Heneghan, C., Thompson, M., Billingsley, M., and Cohen, D. (2011). Data from: Medical-device recalls in the UK and the device-regulation process: retrospective review of safety notices and alerts. *Dryad Digit. Repos.* doi:https://doi.org/10.5061/dryad.585t4.
- Jolliffe, I. (2002). *Principal Component Analysis*. New York: Springer.
- Kopelman, N. M., Mayzel, J., Jakobsson, M., Rosenberg, N. A., and Mayrose, I. (2015). Clumpak: a program for identifying clustering modes and packaging population structure inferences across K. *Mol. Ecol. Resour.* 15, 1179–1191. doi:10.1111/1755-0998.12387.
- McTavish, E. J., Decker, J. E., Schnabel, R. D., Taylor, J. F., and Hillis, D. M. (2013). New World cattle show ancestry from multiple independent domestication events. *Proc. Natl. Acad. Sci.* 110, E1398–E1406.
- Muscarella, R., Galante, P. J., Soley-Guardia, M., Boria, R. A., Kass, J. M., Uriarte, M., et al. (2014). ENMeval: An R package for conducting spatially independent evaluations and estimating optimal model complexity for MAXENT ecological niche models. *Methods Ecol. Evol.* 5, 1198–1205. doi:10.1111/2041-210X.12261.
- Royle, J. A., Chandler, R. B., Yackulic, C., and Nichols, J. D. (2012). Likelihood analysis of species occurrence probability from presence-only data for modelling species distributions: *Likelihood analysis of presence-only data*. *Methods Ecol. Evol.* 3, 545–554. doi:10.1111/j.2041-210X.2011.00182.x.

The Bovine HapMap Consortium, Gibbs, R. A., Taylor, J. F., Van Tassell, C. P., Barendse, W., Eversole, K. A., et al. (2009). Genome-Wide Survey of SNP Variation Uncovers the Genetic Structure of Cattle Breeds. *Science* 324, 528–532. doi:10.1126/science.1167936.

US Geological Survey (USGS) Earth Resources Observation and Science (EROS) Center - Famine Early Warning Systems Network (FEWS NET). Available at: <https://earlywarning.usgs.gov/fews>.
